# Supplementary material for: Pinostrobin and Tectochrysin Conquer Multidrug-Resistant Cancer Cells via Inhibiting P-Glycoprotein ATPase
Source: MDPI journal article supplement (doi:10.3390/ph16020205), 2023-01-29
Supplement: s1 [file s1]

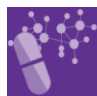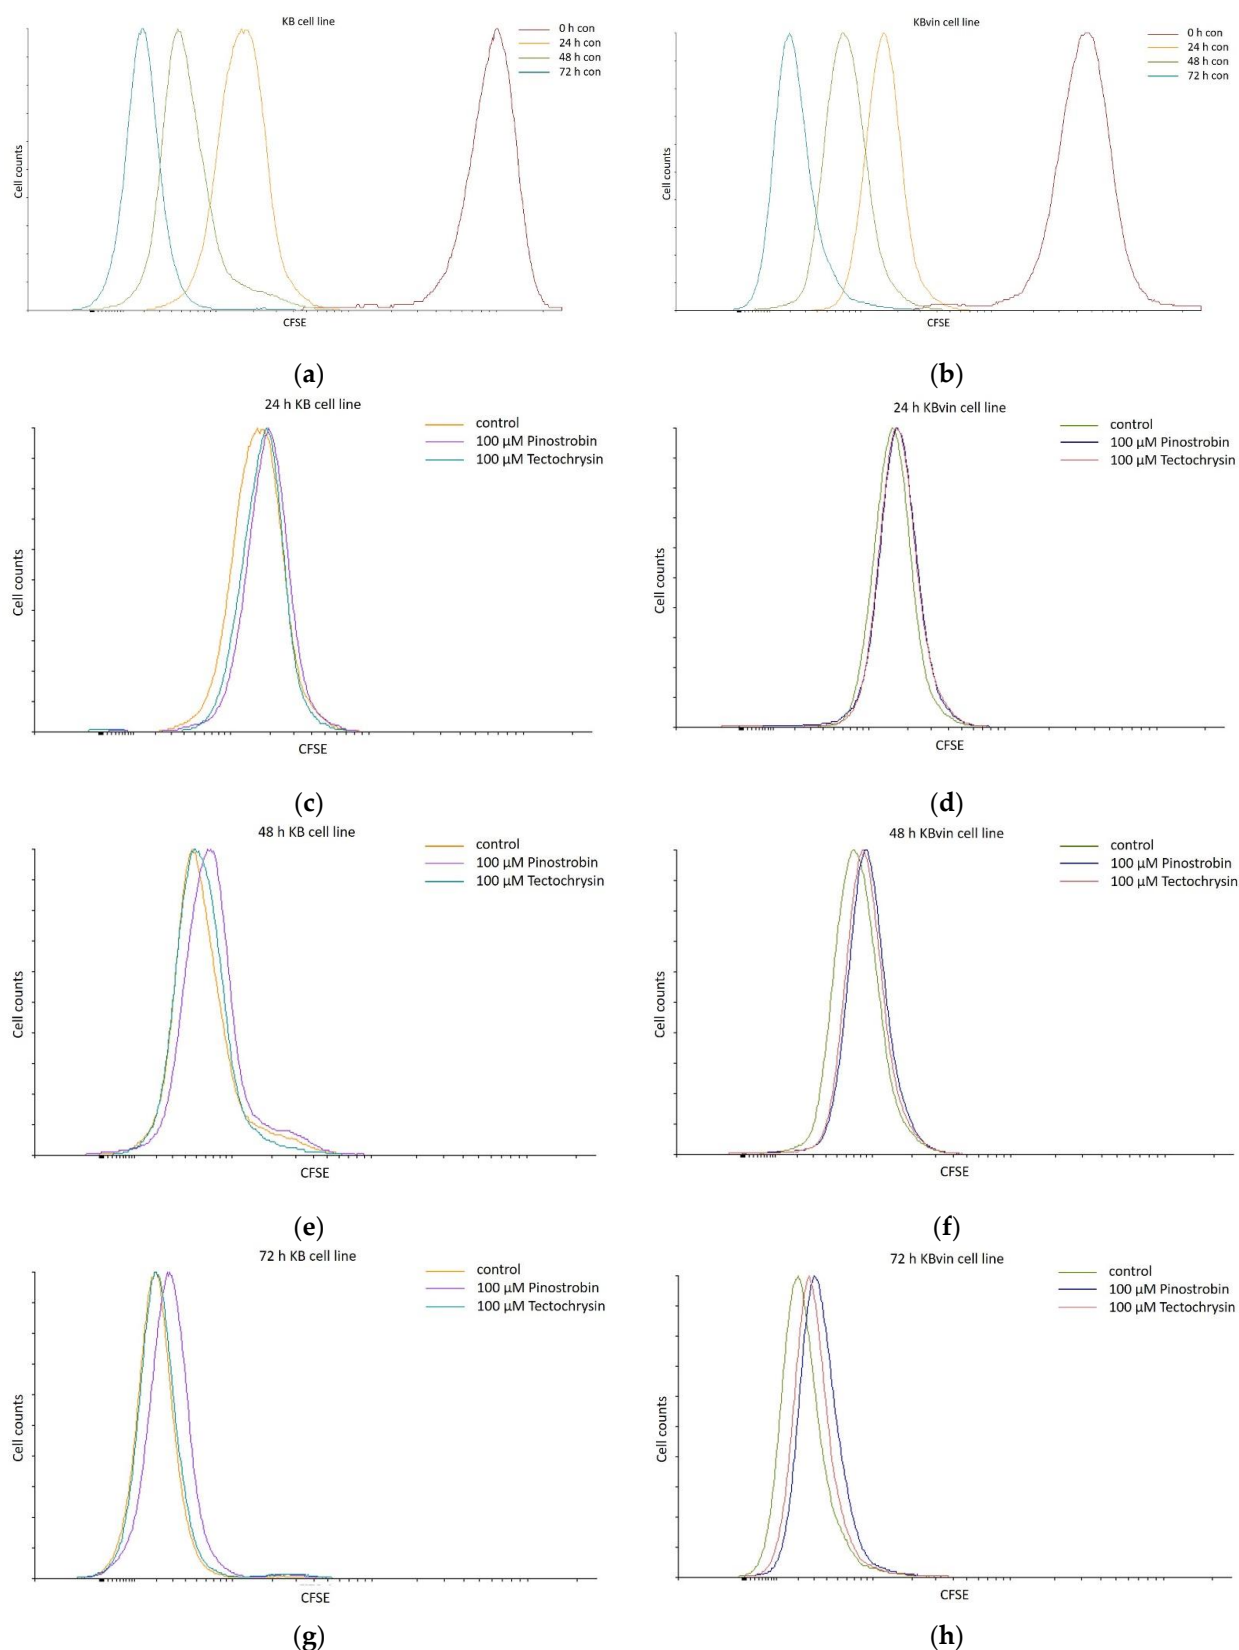

**Figure S1.** The distribution of CFSE fluorescence was analyzed by flow cytometry at 0, 24, 48 and 72 h. (a) and (b) were the fluorescence of KB and KBvin cells at different time points. (c), (e) and (g) demonstrated the fluorescence peak of KB cells after pinostrobin or tectochrysin treatment for 24 h, 48 h and 72 h, respectively. (d), (f) and (h) suggested the fluorescence peak of KBvin cells.

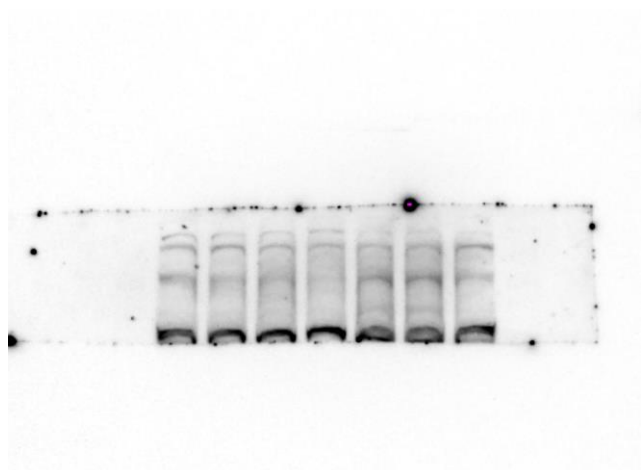

(a)

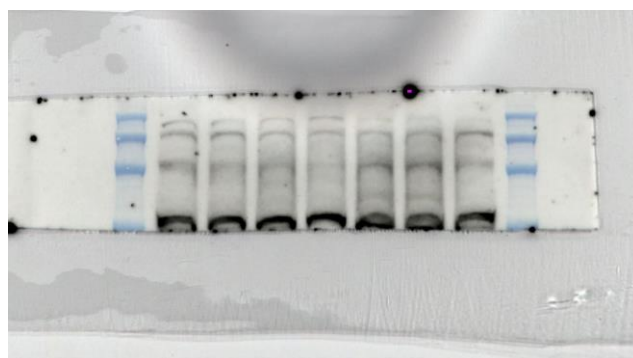

(b)

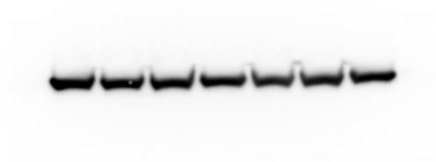

(c)

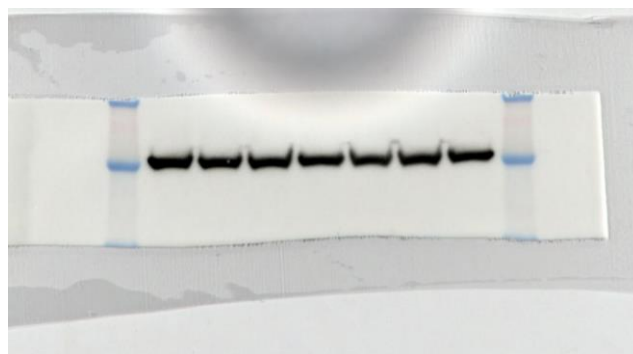

(d)

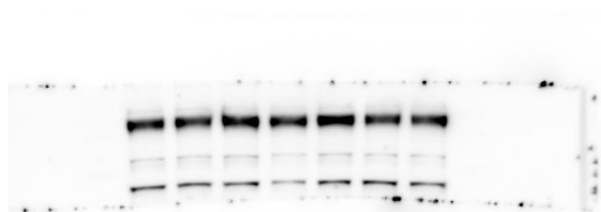

(e)

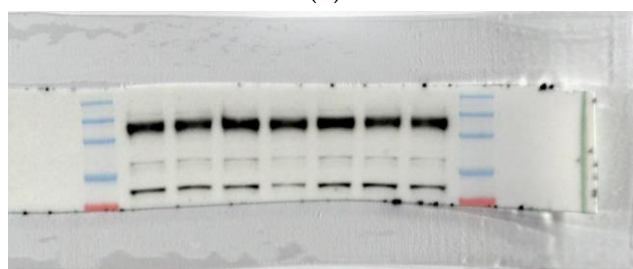

(f)

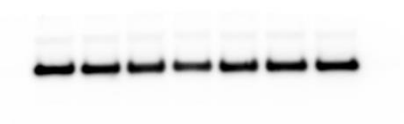

(g)

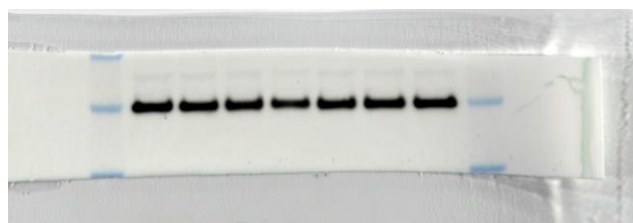

(h)

**Figure S2.** The raw data of Western blotting. (a), (c), (e) and (g) were the raw data of chemiluminescence. (b), (d), (f) and (h) demonstrated the data containing marker. (a–d) presented the bands of P-gp and beta-actin in KB cells, respectively. (e) ~ (h) indicated the bands of P-gp and beta-actin in KBvin cells.

Table S1. IC<sub>50</sub> values (72 h) of tariquidar in HeLa S3 and KBvin cell lines.

| Treatment  | HeLa S3 (drug sensitive)   | KBvin (resistant)          |
|------------|----------------------------|----------------------------|
|            | IC <sub>50</sub> (μM) ± SE | IC <sub>50</sub> (μM) ± SE |
| Tariquidar | 16.09 ± 1.01               | 8.66 ± 0.27                |

SE, standard error.

Table S2. IC<sub>50</sub> values (72 h) of the combination of tariquidar with paclitaxel in HeLa S3 and KBvin cells.

| Treatment           | HeLa S3 (drug sensitive)   |      | KBvin (resistant)          |         |
|---------------------|----------------------------|------|----------------------------|---------|
|                     | IC <sub>50</sub> (nM) ± SE | RF   | IC <sub>50</sub> (nM) ± SE | RF      |
| Paclitaxel          | 10.36 ± 0.30               |      | 1178.73 ± 28.45            |         |
| + 1 μM Tariquidar   | 1.06 ± 0.08                | 9.78 | 0.39 ± 0.17                | 3022.39 |
| + 2.5 μM Tariquidar | 1.19 ± 0.25                | 8.71 | 0.24 ± 0.03                | 4911.38 |

RF, reversal fold; SE, standard error. RF = IC<sub>50</sub> values of paclitaxel divided by those of the combination of paclitaxel with tariquidar.
